# Supplementary material for: YY1 Knockdown Relieves the Differentiation Block and Restores Apoptosis in AML Cells
Source: MDPI journal article supplement (doi:10.3390/cancers15154010), 2023-08-07
Supplement: s1 [file s1]

Figure 1

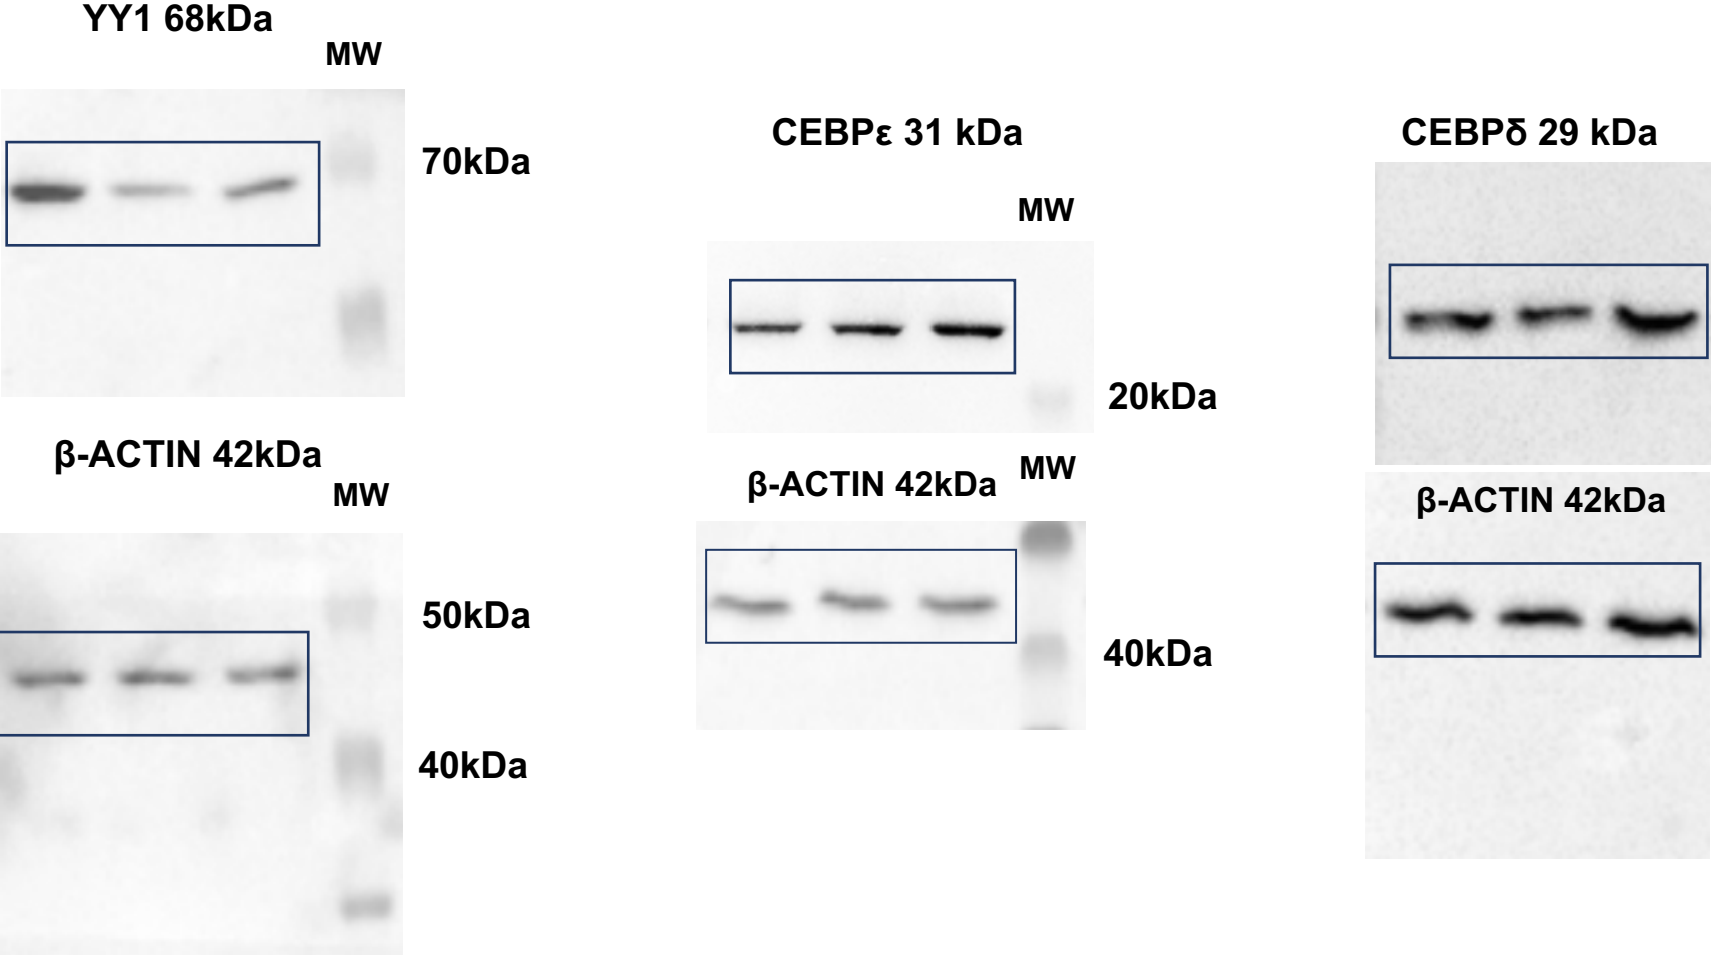

**Figure 2A**

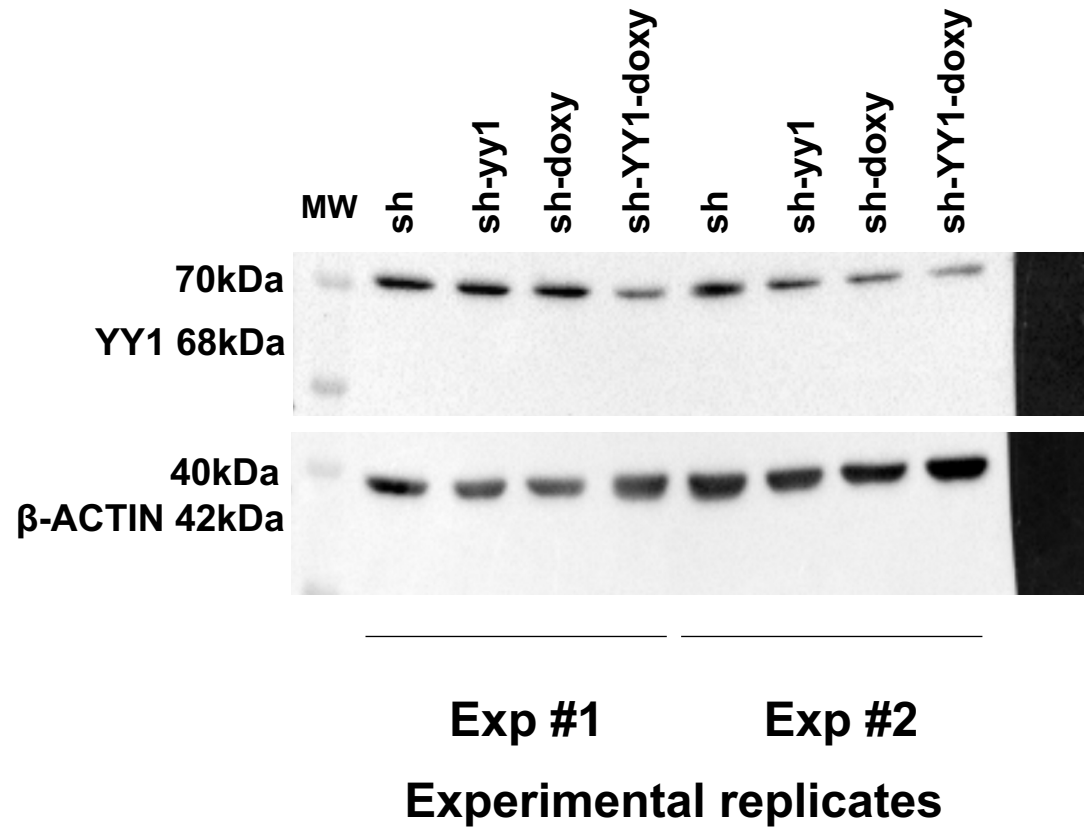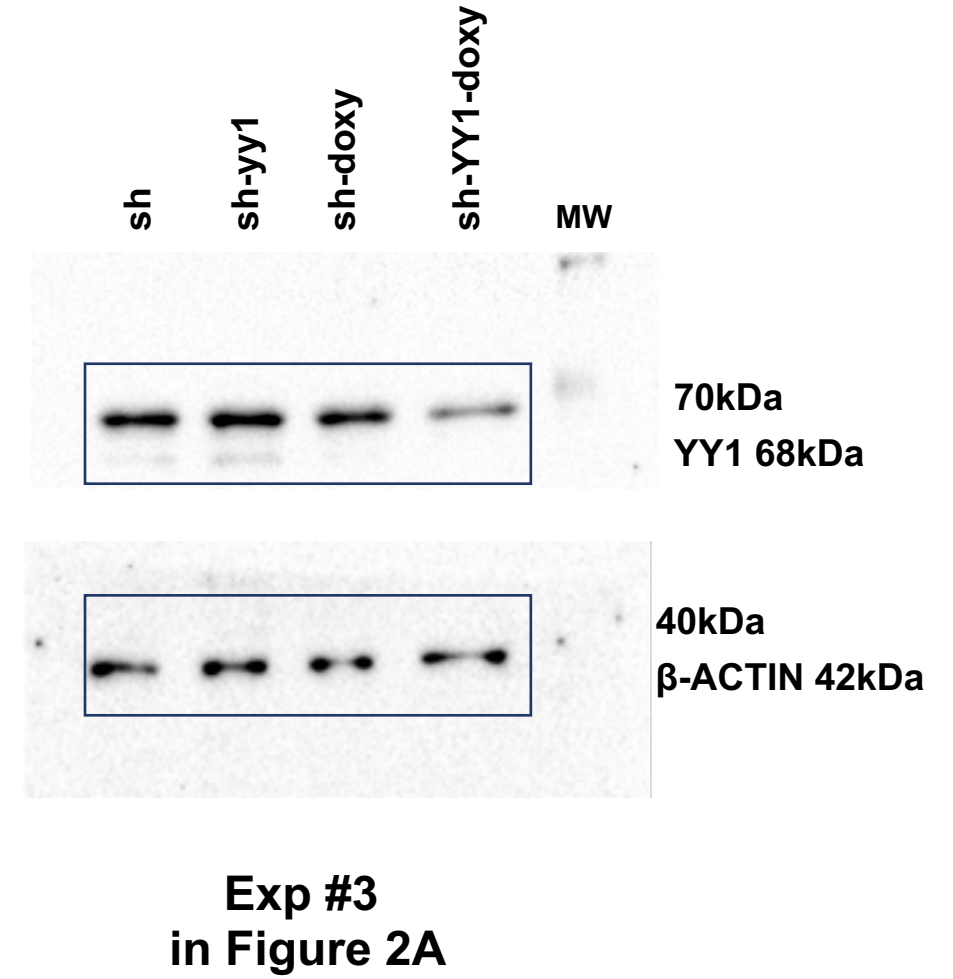

**Figure 2C**

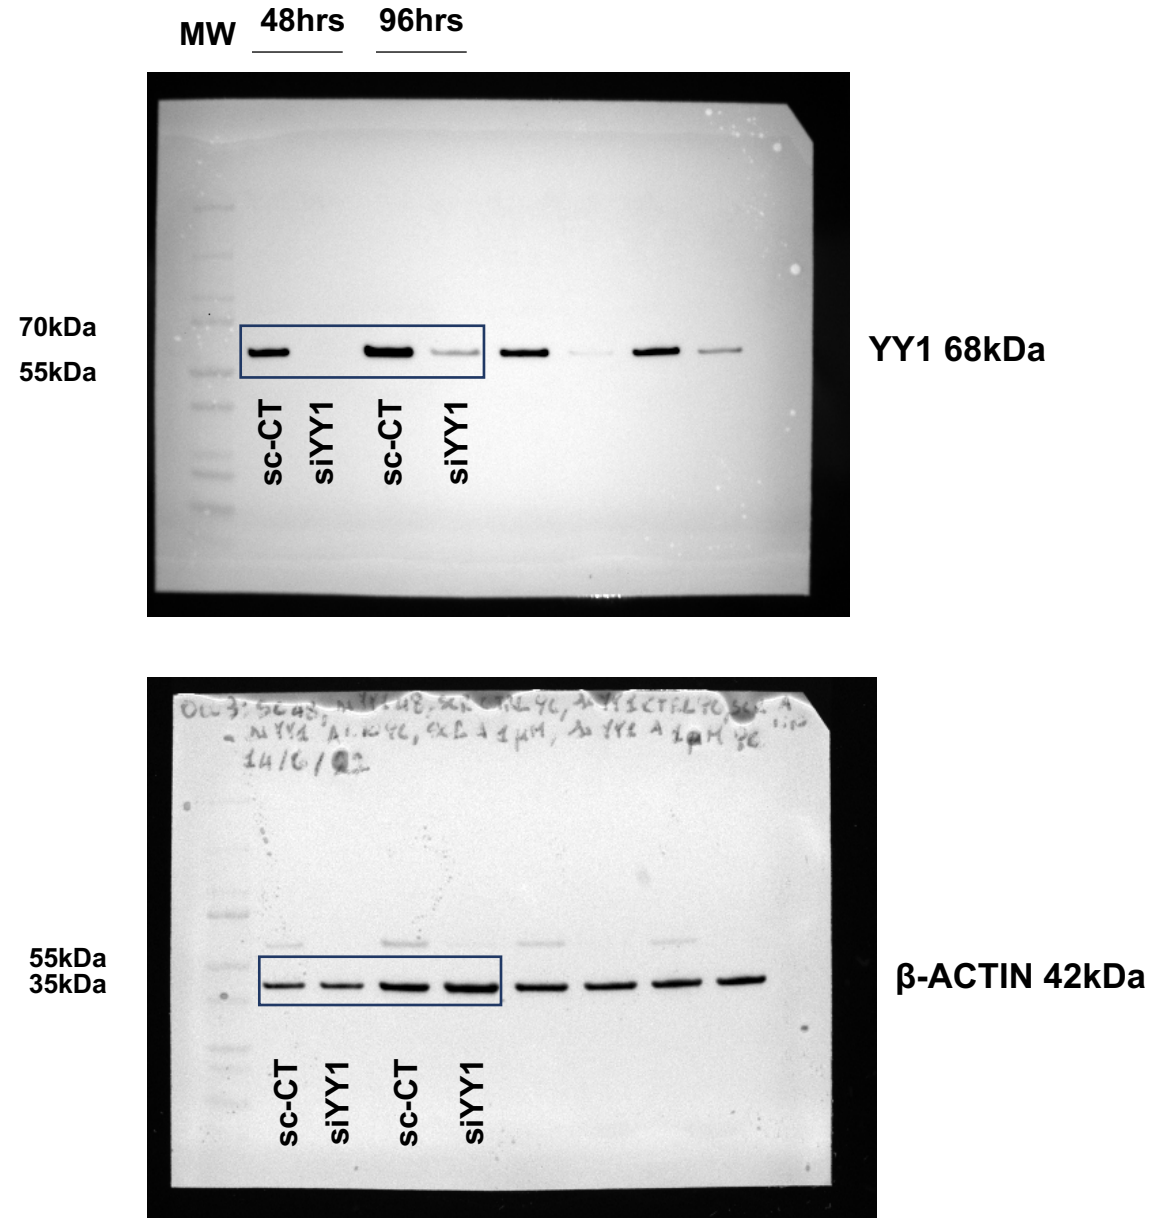

Figure 3

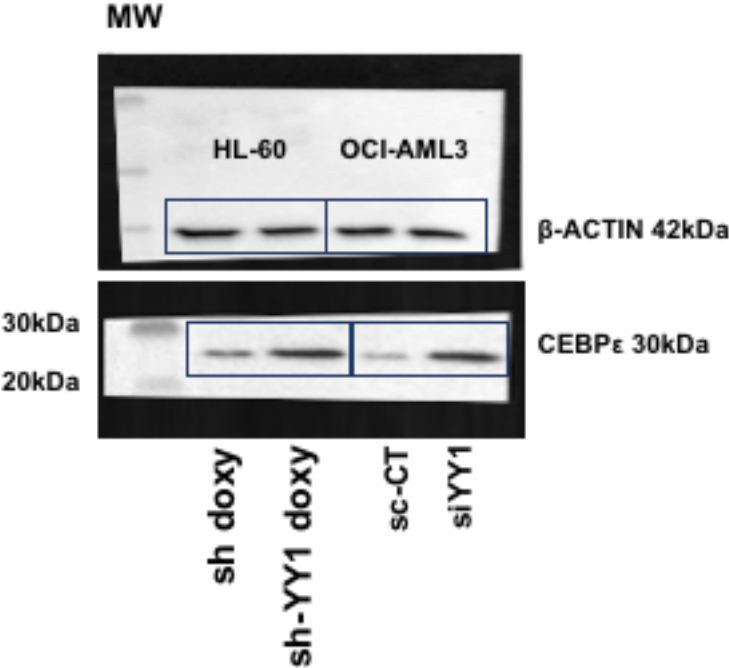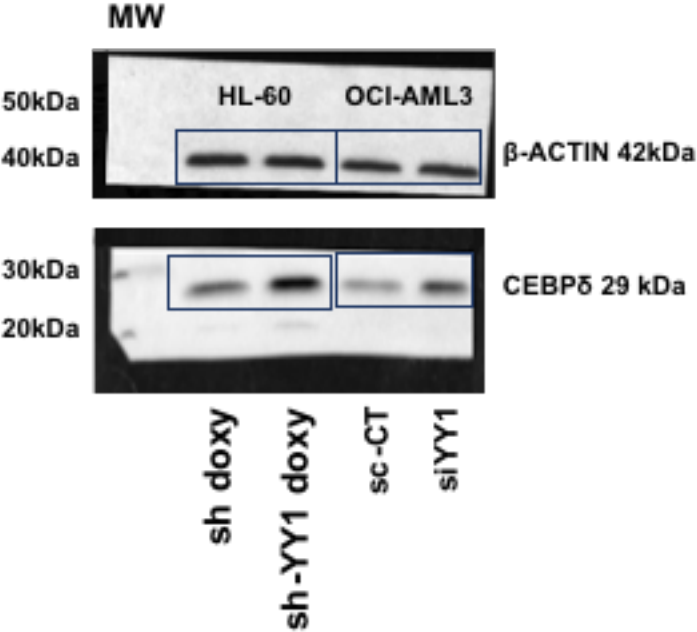



Figure 4

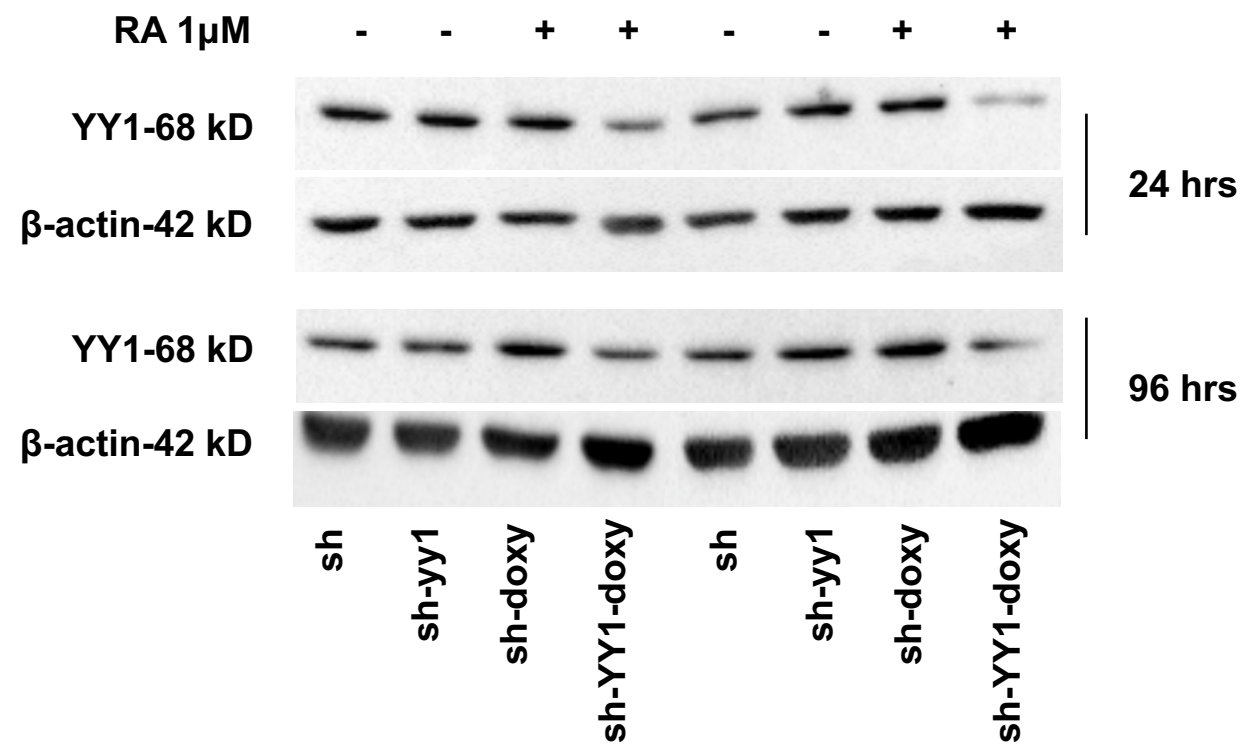

| MW | -ATRA |       | ATRA 1μM | ATRA 0,1μM |
|----|-------|-------|----------|------------|
|    | 48hrs | 96hrs | 96hrs    | 96hrs      |

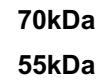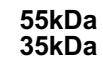

**FIGURE 10**

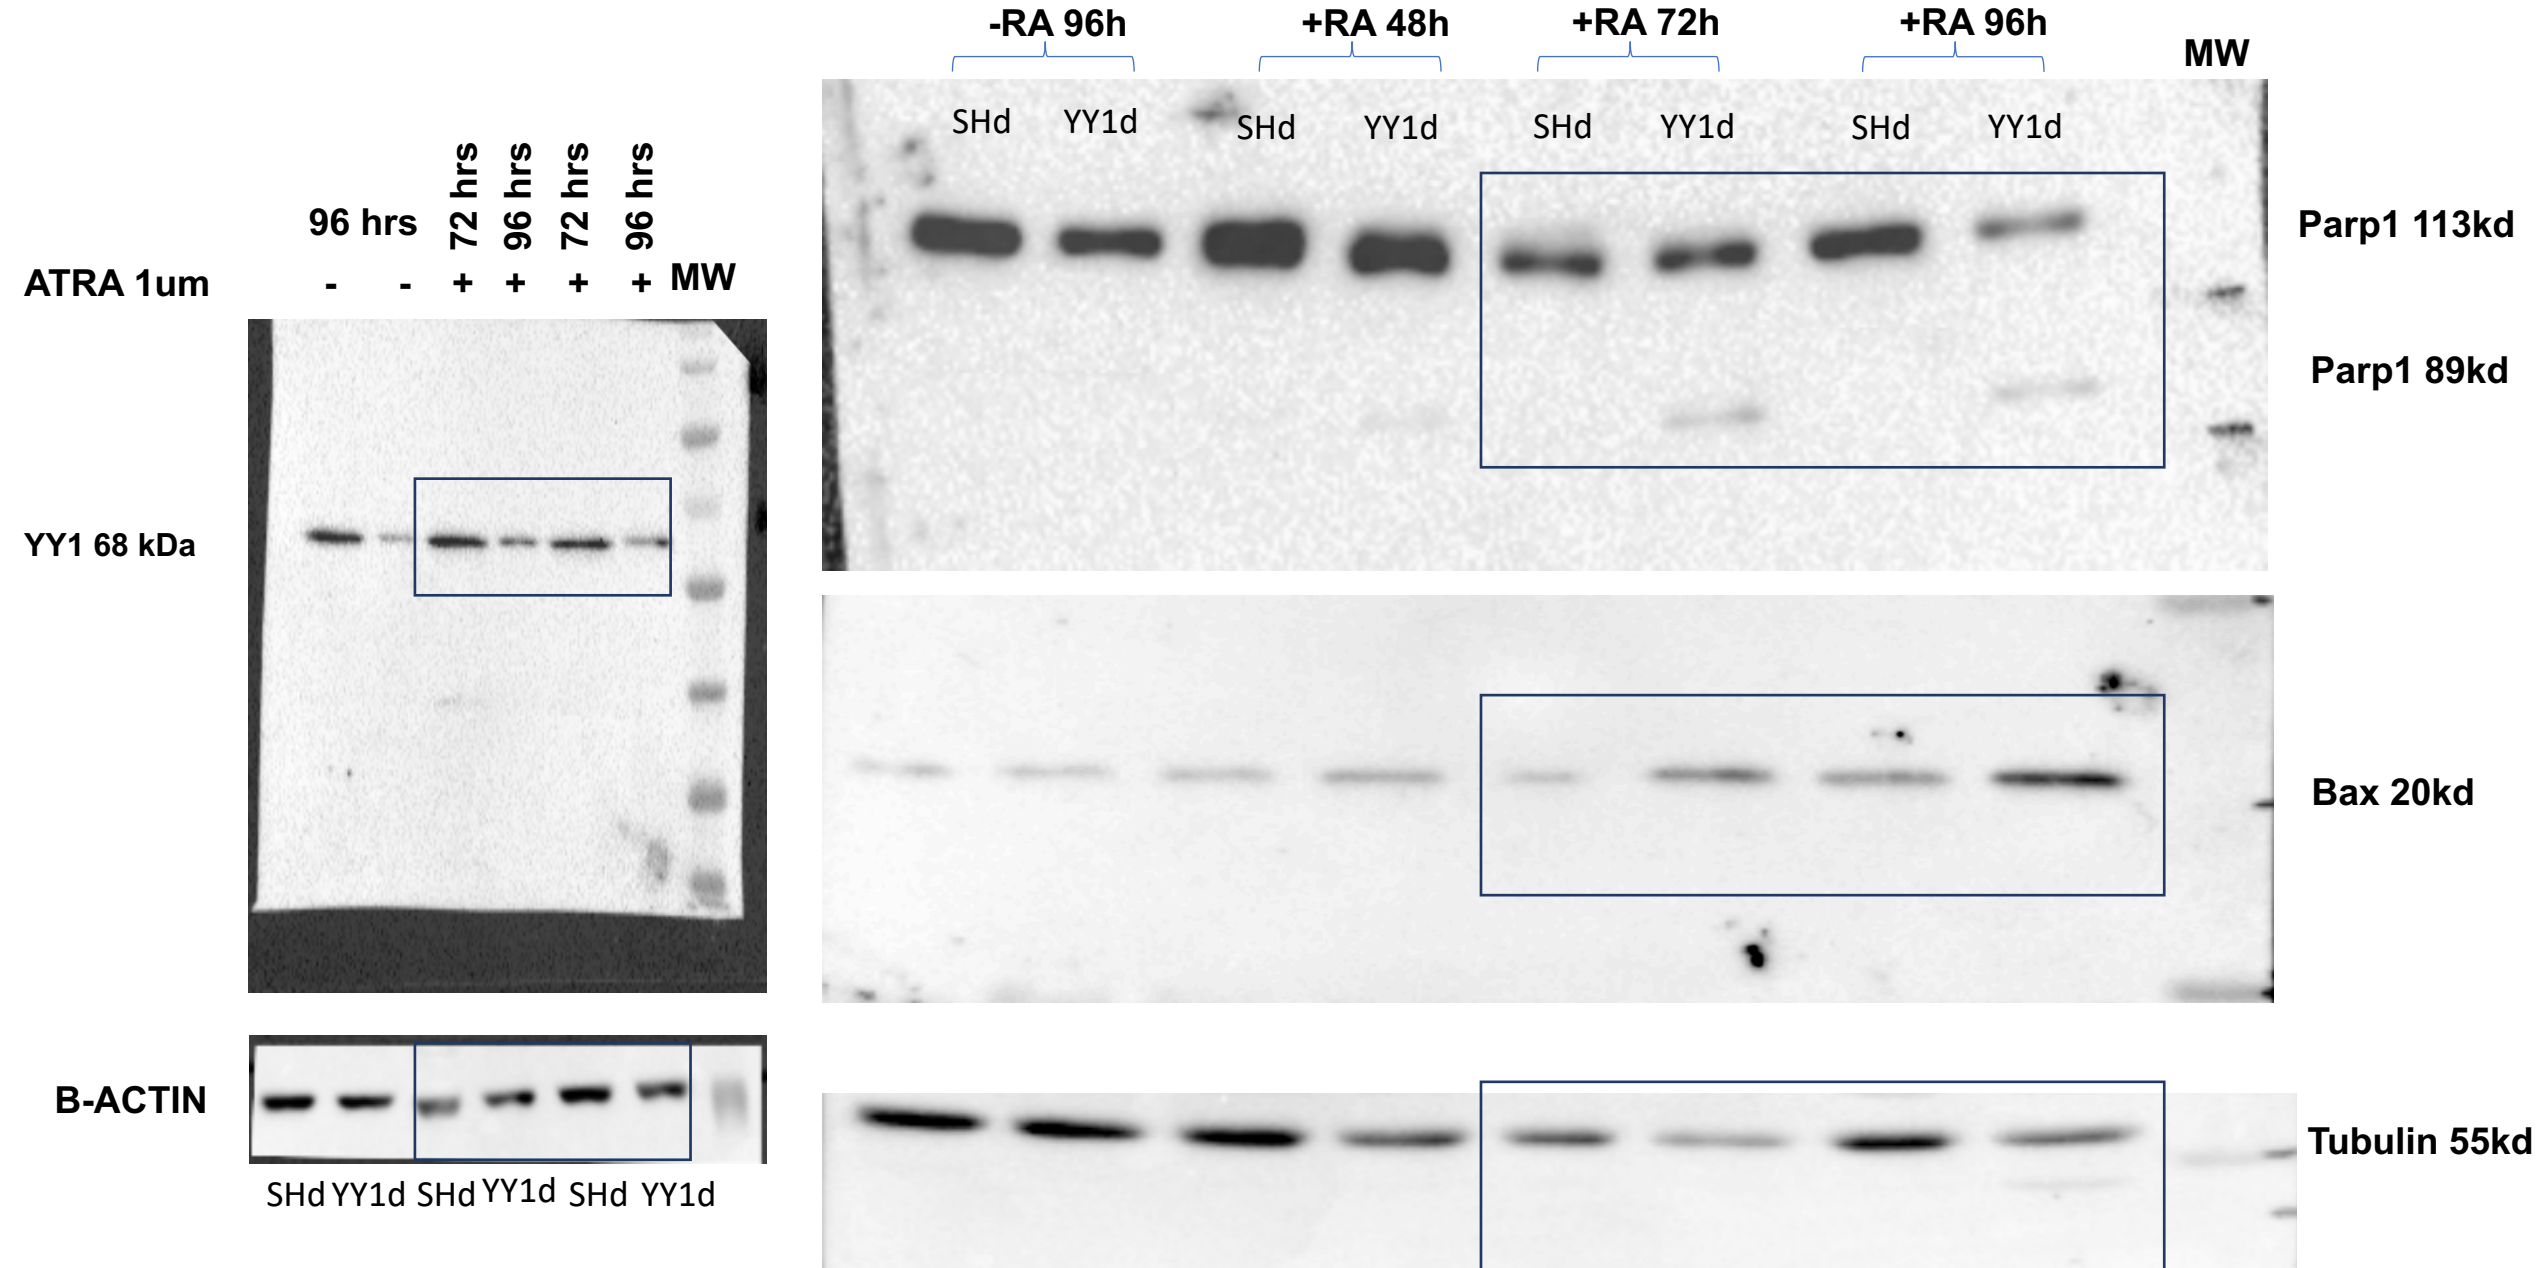

**FIGURE 10**

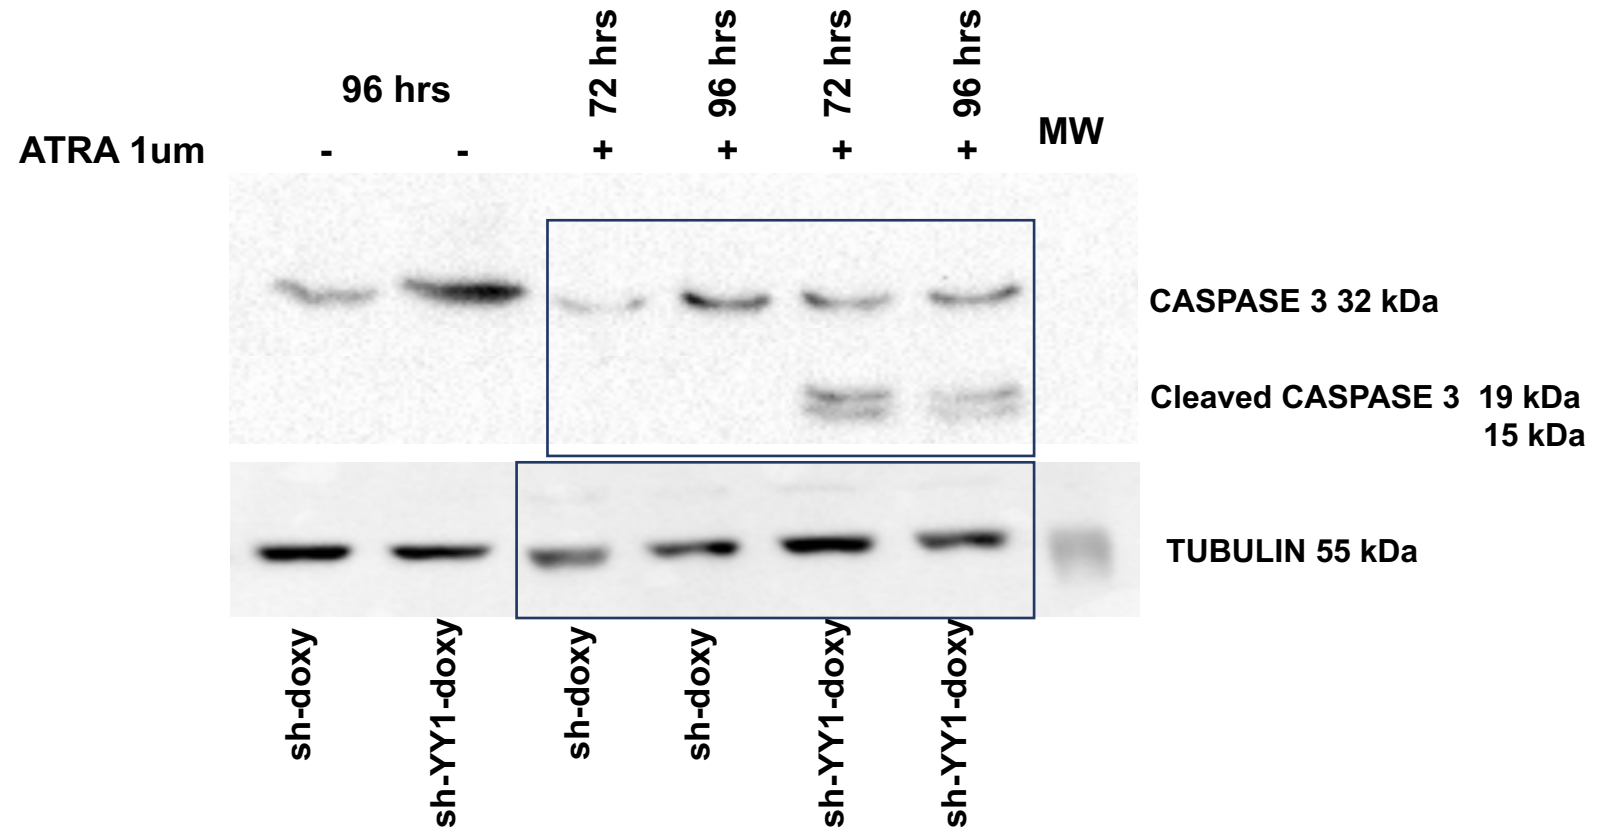

Figure 11

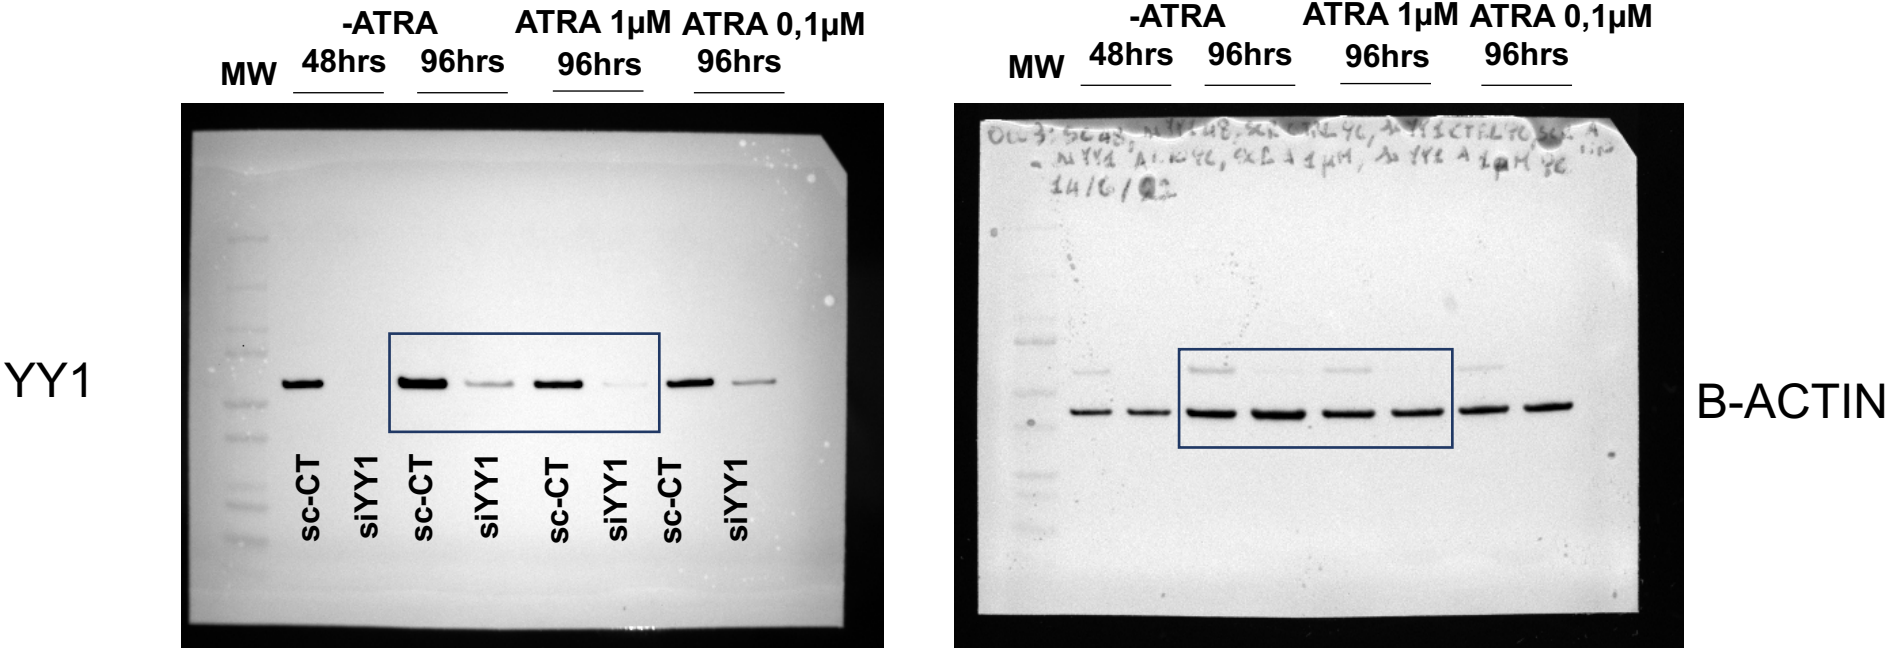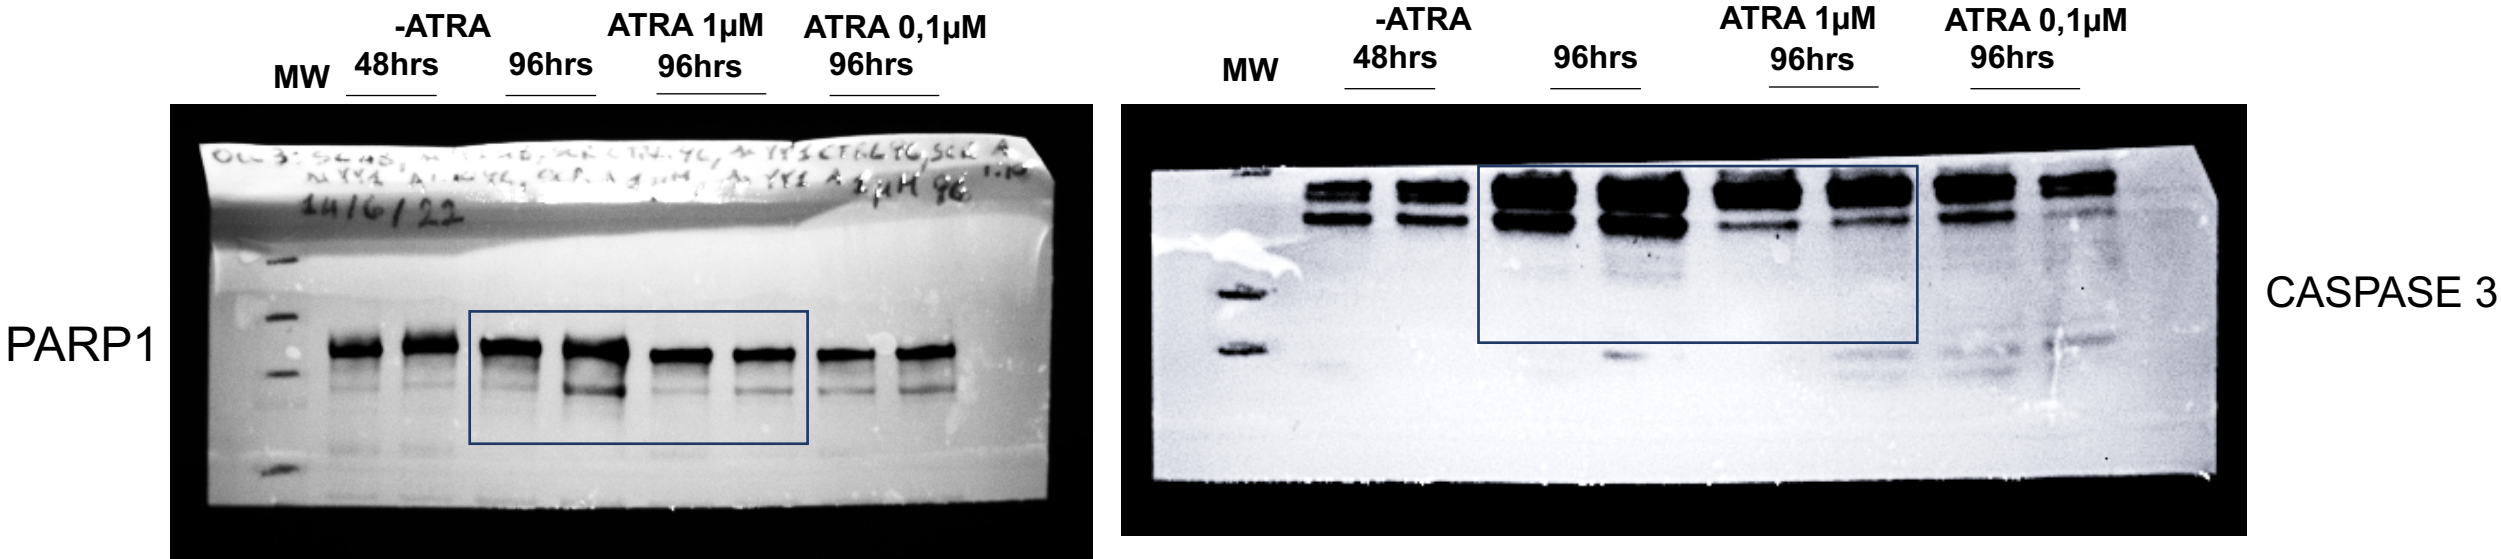

File S1. The original western blot figures.
