# Supplementary material for: YY1 Knockdown Relieves the Differentiation Block and Restores Apoptosis in AML Cells
Source: MDPI journal article supplement (doi:10.3390/cancers15154010), 2023-08-07
Supplement: s1 [file s1]

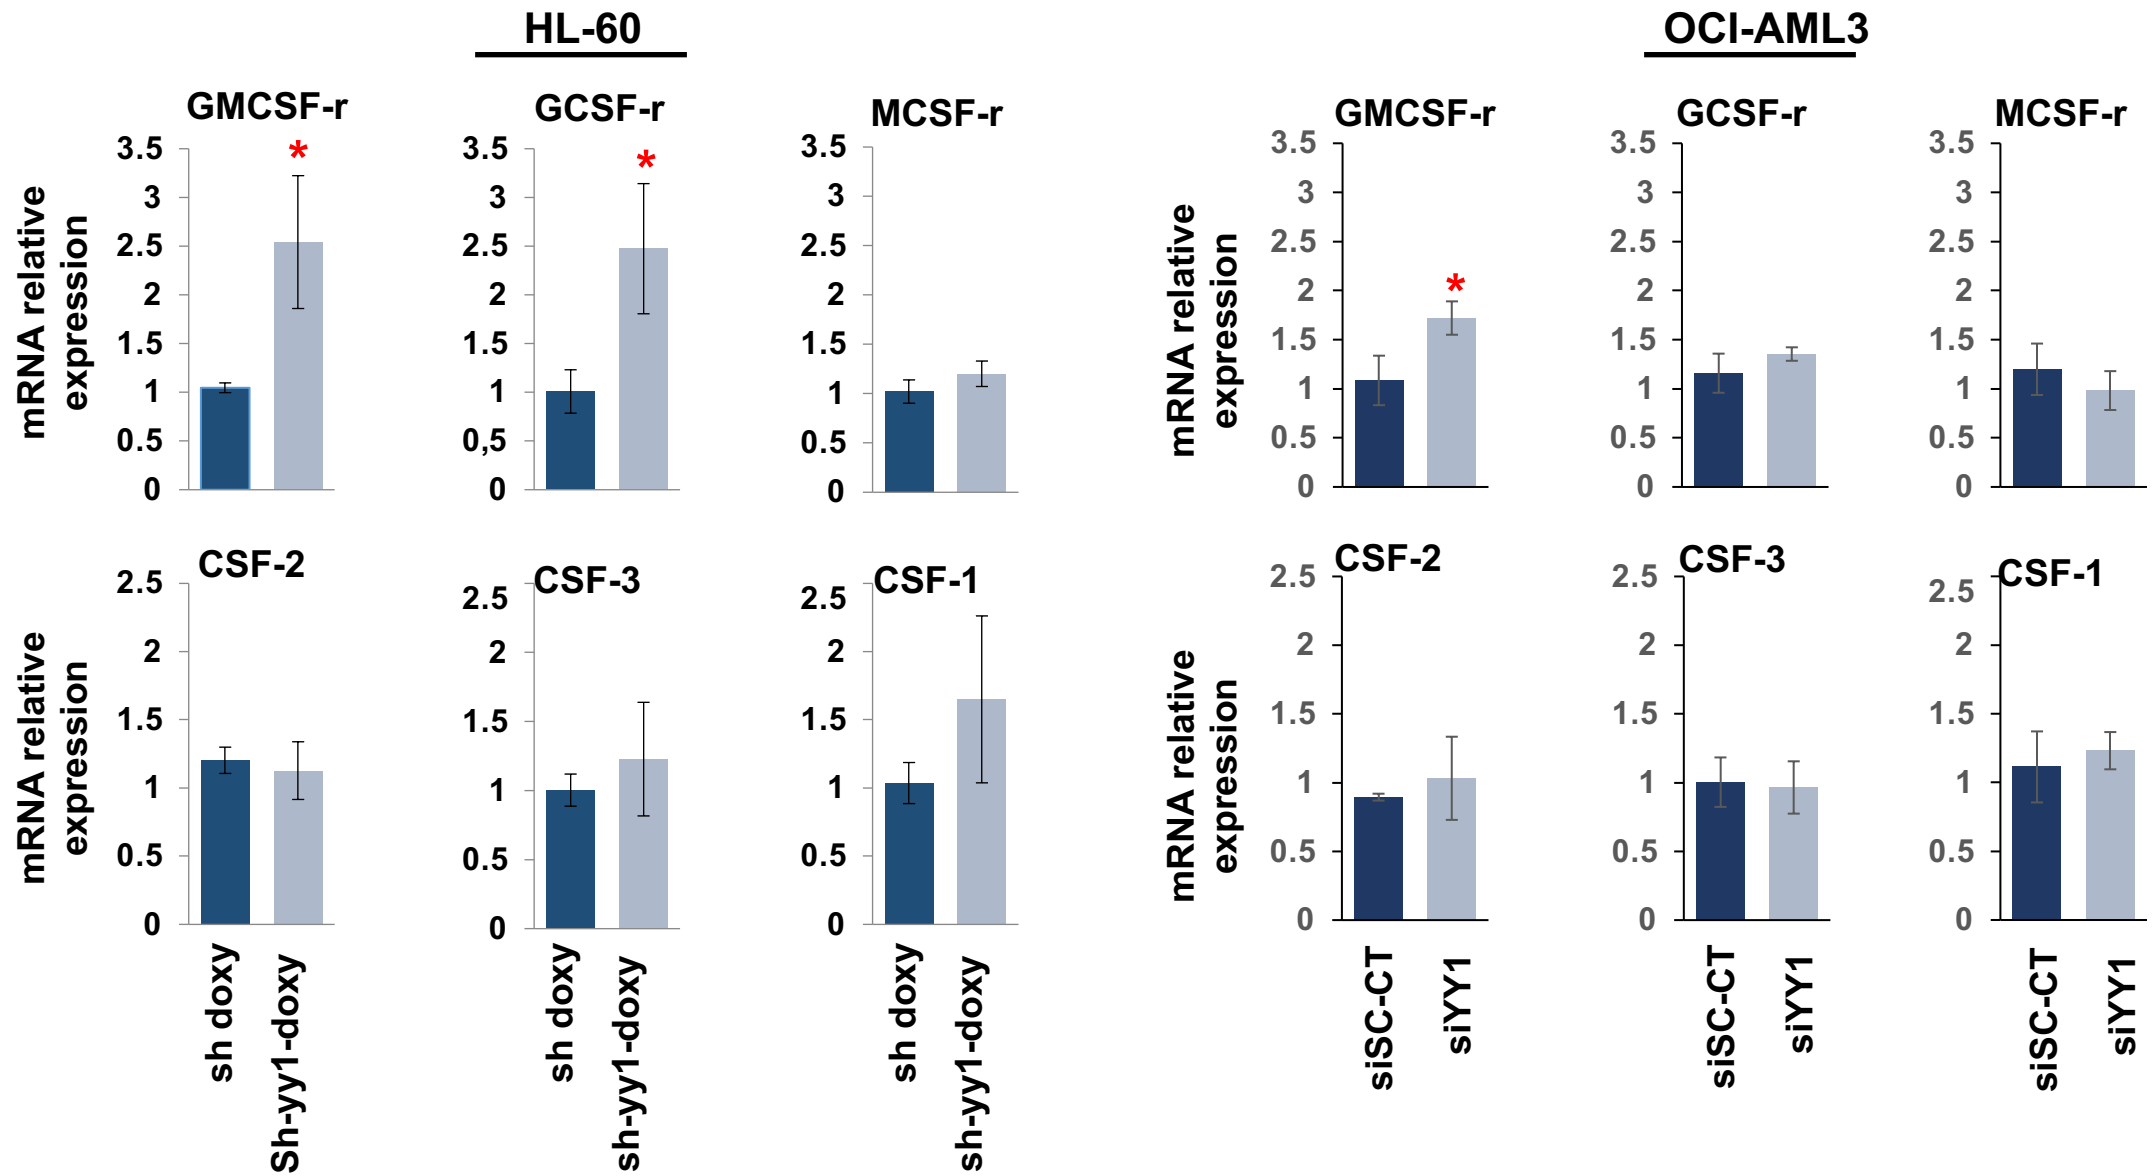

**Supplementary Figure S1:** mRNA expression of myeloid growth factors and receptors in HL-60 and OCI-AML3 YY1 interfered cell lines. mRNA expression levels were normalized to GAPDH levels and expressed as fold induction to control cells value (=1). Each qRT-PCR amplification was performed in triplicate. Statistical analysis was performed in triplicate using the nonparametric Mann-Whitney test. \* p value  $\leq 0.05$ . Error bars: SD, standard deviation.

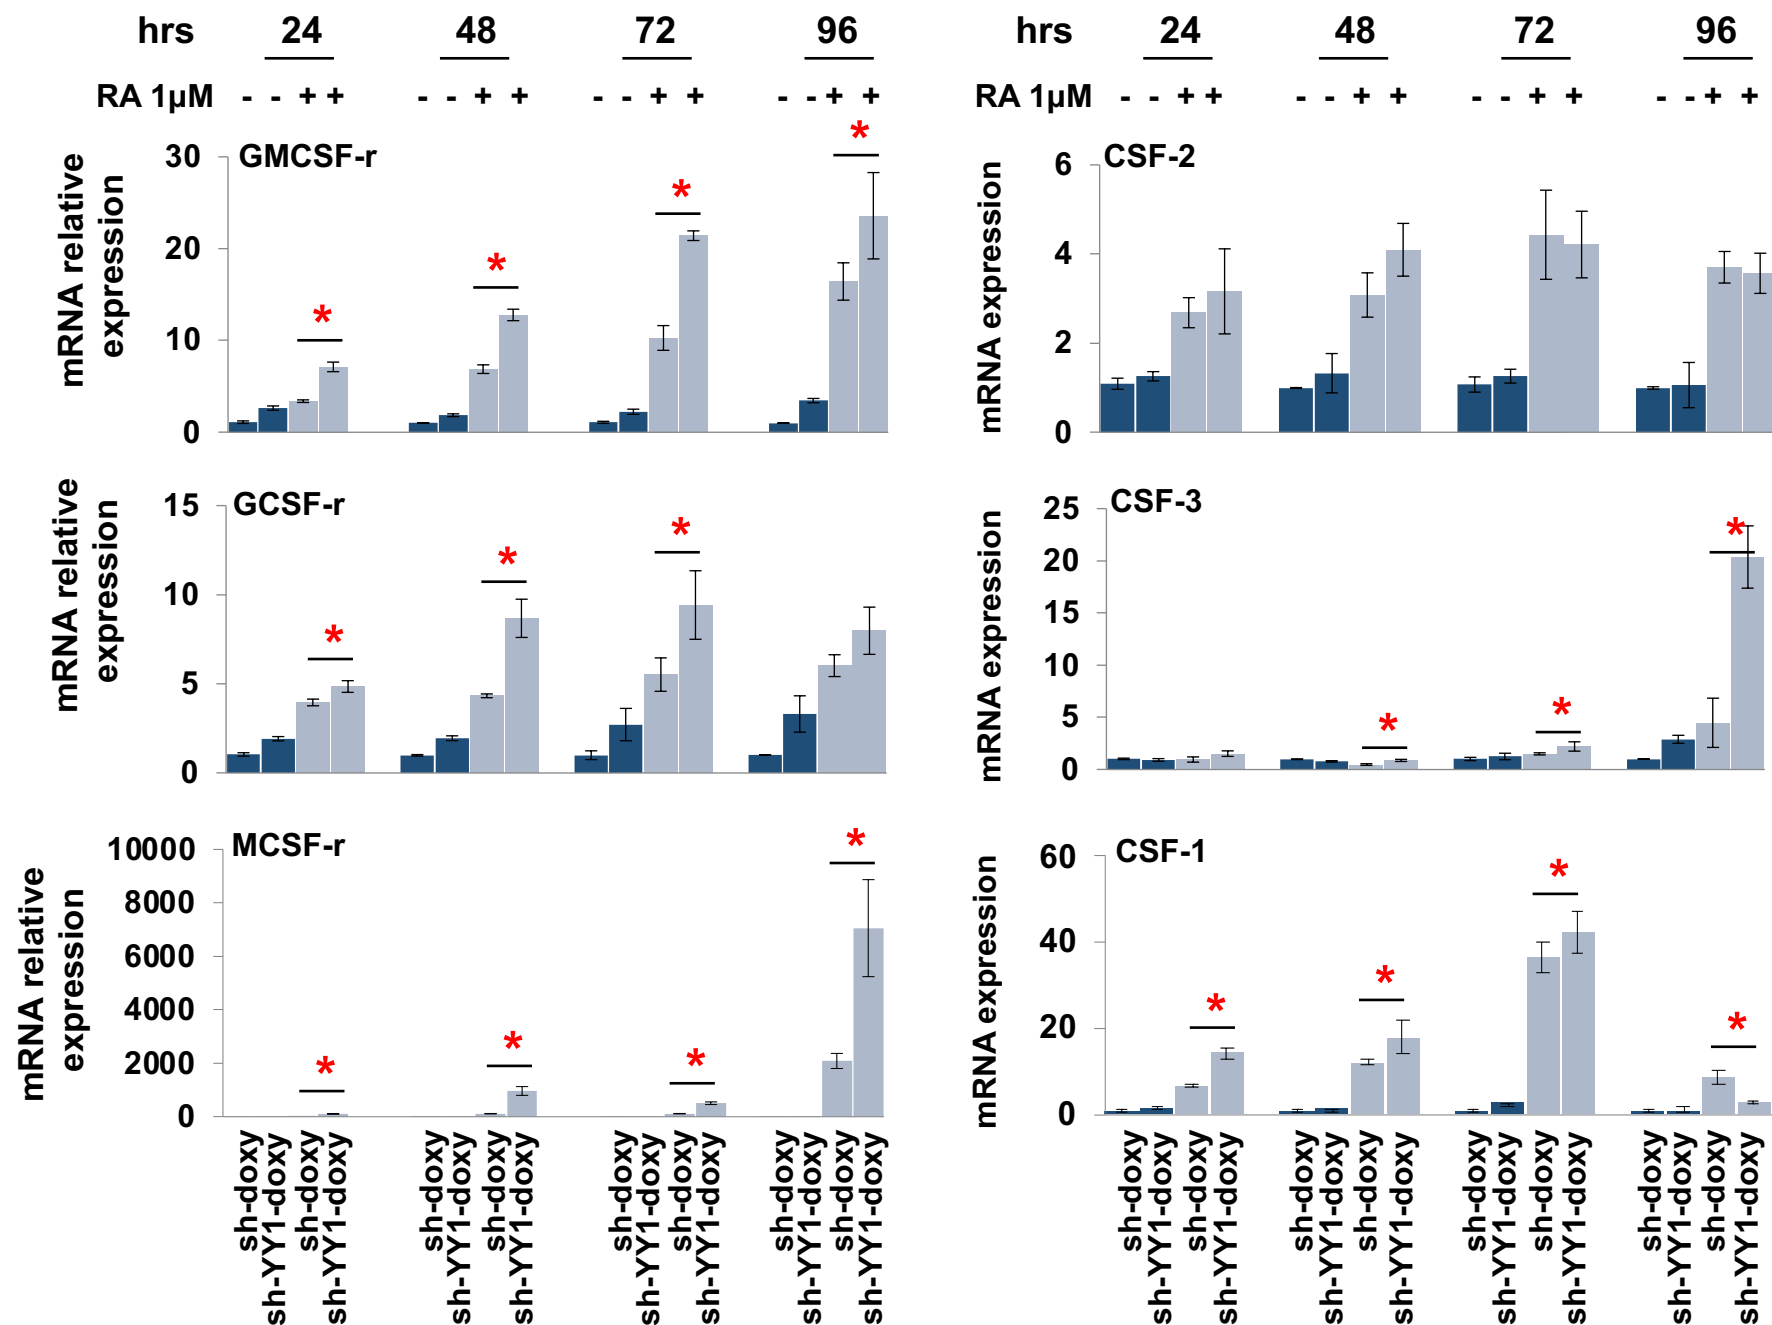

**Supplementary Figure S2:** mRNA expression of myeloid growth factors and receptors in HL-60 control sh-doxycycline and YY1 interfered sh-yy1-doxycycline cell lines. mRNA expression levels were normalized to GAPDH levels and expressed as fold induction to control cells value (=1). Each qRT-PCR amplification was performed in triplicate. Statistical analysis was performed in triplicate using the nonparametric Mann-Whitney test. \* p value  $\leq 0.05$ . Error bars: SD, standard deviation.

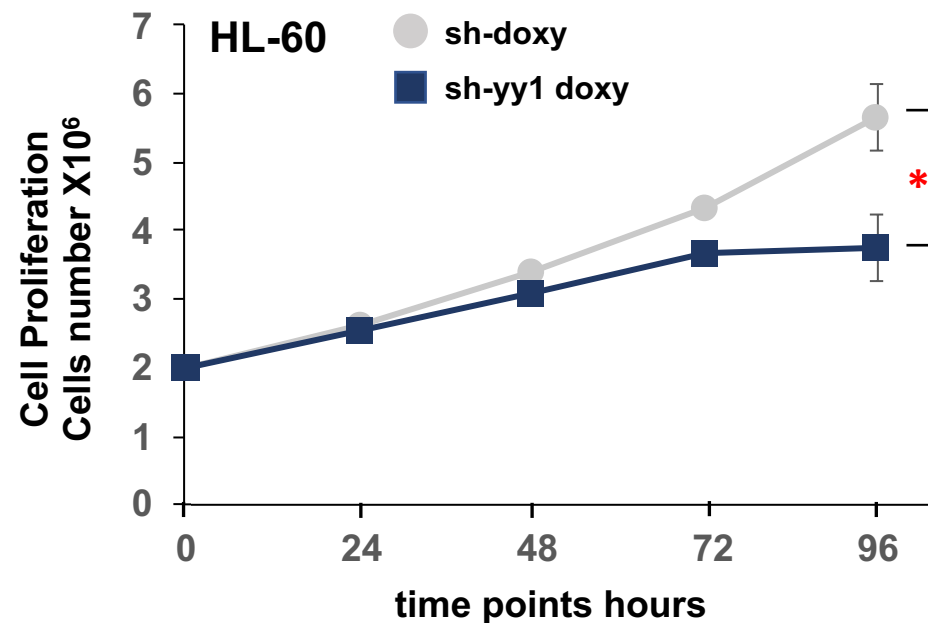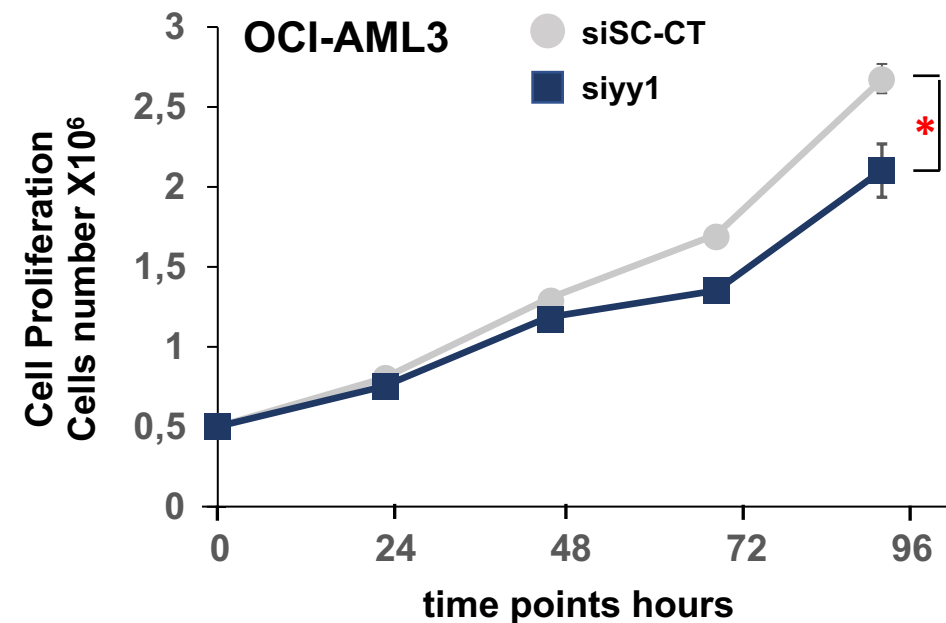

**Supplementary Figure S3:** Cell proliferation of YY1 knocked down HL-60 (sh-yy1 doxy) and OCI-AML3 (siyy1) cells vs their respective cell controls HL-60 sh-doxy and OCI-AML3 siSC-CT, at the indicated time points. \* p value  $\leq 0.05$ .

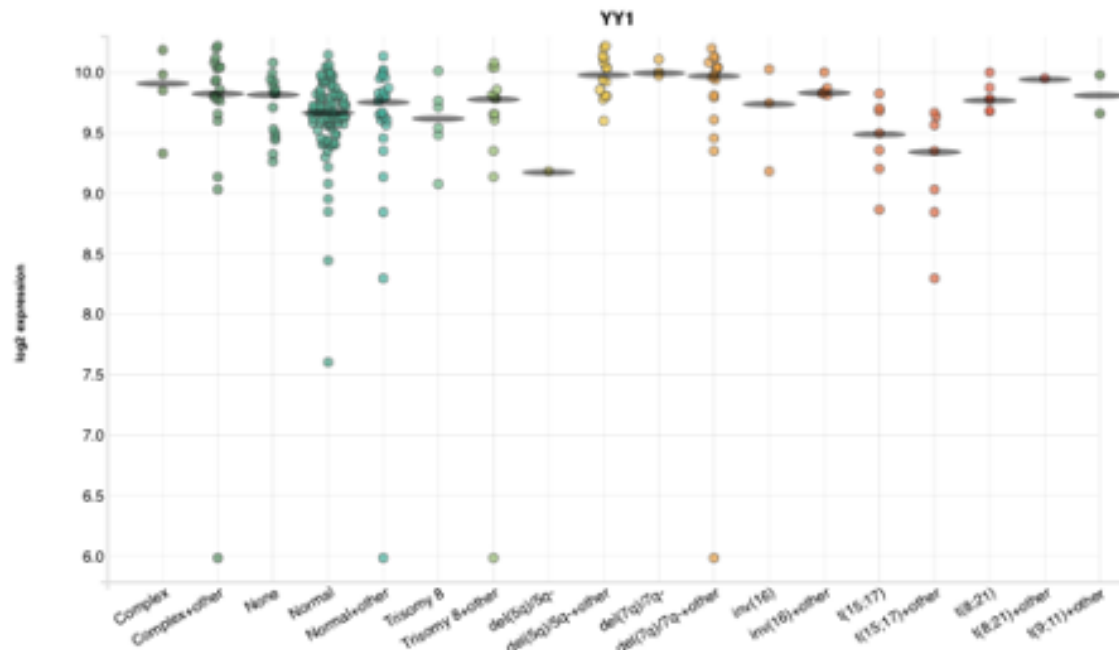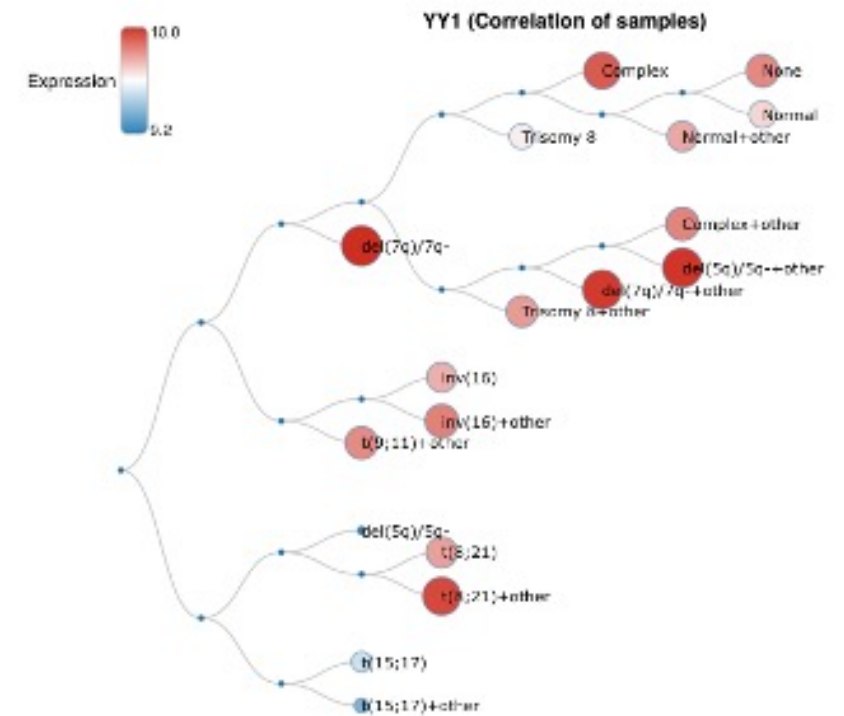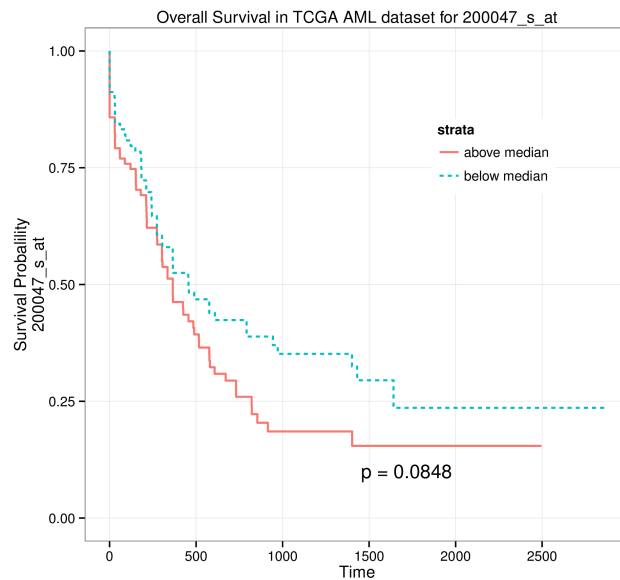

|                 |    |    |    |   |   |   |
|-----------------|----|----|----|---|---|---|
| above median    | 85 | 28 | 9  | 5 | 3 | 0 |
| below median    | 87 | 32 | 19 | 9 | 1 | 1 |
| Numbers at risk |    |    |    |   |   |   |

**Supplementary Figure S4:** data from the cancer genome atlas (TCGA) database (<https://servers.binf.ku.dk/bloodspot/>) highlighted a heterogenous YY1 expression among AML samples, without the presence of associations with specific mutational features and patient prognosis.

**Supplementary Table S1: AML patient sample characteristics.**

| Patient #     | Karyotype        | Mutation                                       |
|---------------|------------------|------------------------------------------------|
| 1             | 46, XX           | -                                              |
| 2             | 47, XX, +8       | -                                              |
| 3             | 46, XY           | -                                              |
| 4             | 47, XX, +11      | <i>FLT3</i> -TKD                               |
| 5             | 46, XY           | <i>FLT3</i> -ITD                               |
| 6             | 46, XY           | -                                              |
| 7             | 46, XY           | -                                              |
| 8             | 46, XY           | -                                              |
| 9             | 46, XY           | -                                              |
| 10            | 46, XY           | -                                              |
| 11            | 46, XX           | <i>FLT3</i> -ITD, <i>NPM1</i>                  |
| 12            | -                | <i>FLT3</i> -ITD, <i>NPM1</i>                  |
| 13            | -                | -                                              |
| 14            | 46, XX           | <i>FLT3</i> -TKD, <i>NPM1</i> ,<br><i>IDH2</i> |
| 15            | -                | <i>FLT3</i> -ITD, <i>NPM1</i> ,<br><i>IDH1</i> |
| 16            | 46, XX           | <i>NPM1</i>                                    |
| 17            | 46, XY           | <i>FLT3</i> -ITD                               |
| 18            | 46, XY           | <i>FLT3</i> -TKD                               |
| 19            | -                | -                                              |
| 20<br>relapse | 46, XX           | -                                              |
| 21            | -                | <i>IDH1</i>                                    |
| 22            | -                | <i>FLT3</i> -TKD, <i>NPM1</i>                  |
| 23            | 47, XY, +8       | <i>IDH2</i>                                    |
| 24            | 46, XY, t(15;17) | -                                              |
